# Supplementary material
Source: publisher figshare collection journal article supplement (https://asha.figshare.com/articles/dataset/_/14888481)
Supplement: Supplementary file 1 [file 1]

## Sheet: Sheet1
Supplemental material, Chow et al., “Reporting and Reproducibility of Meta-Analysis in Speech, Language, and Hearing Research,” JSLHR, https://doi.org/10.1044/2021_JSLHR-21-00047
Supplemental Material S5. Complete data.
	article				general			eligibility					moderators	search					screening								methods					bias		search_result								summary				data
Study ID	authors	title	journal	year	meta_type	funded	protocol	design	population	intervention	outcomes	grey	justification	databases	terms	string	dates	missing	abstract	full_text	coding_manual (did authors report or provide coding manual)	coding_process (did authors report how to coding process occurred)	screening_reli (authors reported reli process)	screening_reli_estimate	coding_reli (authors report coding reli process)	coding_reli_estimate	metric	dependency (within-study, within-research-group)	synthesis	weights (specifies weighting procedure)	ES extraction (authors report on effect size extraction methods over and above the primary ES metric)	pub_bias	rob	number_search	number_abstract	number_fulltext	number_extra	number_final	prisma_chart	prisma_check_cite	prisma_check_attach	n (report aggregate sample size for full meta?)	n (report sample size of individual included articles?)	es(report of es included in each individual article)	mod_data (report of moderator info included in each individual article)	data (did authors provide data?)	statistical code (did they provide the code?)	Article Count
1	Sandbank & Yoder(2016)	The Association Between Parental Mean Length of Utterance and Language Outcomes in Children With Disabilities: A Correlational Meta-Analysis	American Journal of Speech-Language Pathology	2016	correlational	yes	no	yes	yes	NA	yes	yes	yes	yes	yes	yes	no	yes	yes	yes	yes	no	no	no	no	no	yes	NA	yes	yes	yes	yes	no	yes	yes	yes	yes	yes	yes	no	no	yes	yes	yes	yes	no	no	1
2	Quique et al., 2019	Acquisition and Generalization Responses in Aphasia Naming Treatment: A Meta-Analysis of Semantic Feature Analysis Outcomes	American Journal of Speech-Language Pathology	2019	correlational	yes	no	yes	yes	NA	yes	no	yes	yes	no	no	yes	no	no	no	no	yes	no	no	yes	no	yes	NA	yes	no	no	no	no	yes	no	no	yes	yes	no	no	no	yes	yes	no	yes	yes	yes	1
3	Lammertink et al. (2017)	Statistical Learning in Specific Language Impairment: A Meta-Analysis	Journal of Speech, Language, and Hearing Research	2017	SMD	yes	no	yes	yes	yes	yes	yes	yes	yes	yes	yes	yes	yes	yes	yes	no	no	yes	yes	no	no	yes	yes	yes	yes	yes	yes	no	yes	yes	yes	yes	yes	yes	yes	no	yes	yes	yes	yes	yes	no	1
4	Krok et al. (2015)	Past Tense Production in Children With and Without Specific Language Impairment Across Germanic Languages: A Meta-Analysis	Journal of Speech, Language, and Hearing Research	2015	SMD	yes	no	yes	yes	no	yes	no	yes	yes	yes	yes	no	no	yes	yes	no	yes	no	no	yes	yes	yes	yes	no	no	yes	yes	yes	yes	no	no	yes	yes	yes	no	no	yes	yes	yes	yes	no	no	1
5	Gatlin et al. (2015)	Relations Among Children’s Use of Dialect and Literacy Skills: A Meta-Analysis	Journal of Speech, Language, and Hearing Research	2015	correlational	yes	no	yes	yes	NA	yes	no	yes	yes	yes	no	yes	no	yes	yes	yes	yes	no	no	yes	yes	yes	yes	yes	yes	yes	yes	no	yes	yes	yes	no	yes	no	no	no	yes	yes	yes	yes	no	no	1
6	Latoszek et al. (2018)	A Meta-Analysis: Acoustic Measurement of Roughness and Breathiness	Journal of Speech, Language, and Hearing Research	2018	correlational	no	no	no	yes	NA	yes	no	no	yes	yes	no	yes	no	no	no	no	yes	no	no	yes	yes	yes	no	yes	yes	yes	no	no	no	no	no	no	yes	no	no	no	no	yes	yes	yes	no	no	1
7	Cristia et al. (2019)	Accuracy of the Language Environment Analysis System Segmentation and Metrics: A Systematic Review	Journal of Speech, Language, and Hearing Research	2019	Correlational	yes	no	no	yes	NA	yes	yes	yes	yes	no	no	yes	no	yes	yes	yes	yes	yes	no	yes	no	yes	no	yes	yes	yes	no	yes	yes	yes	yes	yes	yes	yes	yes	no	no	yes	yes	yes	yes	yes	1
8	Systad et al., 2020	The Value of Electroencephalpgram in Assessing Children With Speech and Language Impairments	Journal of Speech, Language, and Hearing Research	2019	Correlational	no	yes	yes	yes	NA	yes	yes	yes	yes	yes	yes	no	yes	yes	yes	no	yes	yes	yes	yes	no	yes	NA	yes	yes	no	yes	yes	yes	yes	yes	yes	yes	yes	no	no	yes	no	no	yes	no	no	1
9	Rodvick et al., 2019	Consonant and Vowel Identification in Cochlear Implant Users Measured by Nonsense Words: A Systematic Review and Meta-Analysis	Journal of Speech, Language, and Hearing Research	2018	SMD	no	yes	yes	yes	yes	yes	yes	yes	yes	yes	yes	yes	no	yes	yes	no	no	yes	no	no	no	yes	no	yes	yes	no	yes	yes	yes	yes	yes	yes	yes	yes	yes	no	yes	yes	no	yes	no	no	1
10	Sandbank et al., 2020	Intervention Effects on Language in Children with Austism: A Project AIM Meta-Analysis	Journal of Speech, Language, and Hearing Research	2020	SMD	yes	no	yes	yes	yes	yes	yes	yes	yes	yes	no	no	yes	no	yes	yes	no	no	no	no	yes	yes	yes	yes	no	yes	yes	yes	yes	no	no	no	yes	no	no	no	yes	no	yes	yes	yes	no	1
11	Fisher, 2017	A Systematic Review and Meta-Analysis of Predictors of Expressive-Languge Outcomes Among Late Talkers	Journal of Speech, Language, and Hearing Research	2017	both	no	no	yes	yes	no	yes	yes	yes	yes	yes	yes	yes	yes	yes	yes	yes	no	yes	yes	yes	yes	yes	no	yes	no	yes	yes	yes	yes	yes	yes	yes	yes	yes	yes	no	yes	yes	no	yes	no	no	1
12	Cleave et al., 2015	The Efficacy of Recasts in Language Intervention: A Systematic Review and Meta-Analysis	American Journal of Speech-Language Pathology	2015	SMD	yes	no	yes	yes	yes	yes	no	no	yes	yes	yes	yes	no	yes	yes	no	no	yes	no	no	no	yes	yes	no	yes	yes	no	yes	yes	yes	yes	yes	yes	no	no	no	no	yes	yes	no	no	no	1
13	Scott, Roberts, & Glennen (2011)	How Well Do Children Who Are Internationally Adopted Acquire Language? A Meta-Analysis	Journal of Speech, Language, and Hearing Research	2011	SMD	no	no	yes	yes	yes	yes	no	yes	yes	yes	yes	yes	no	yes	yes	yes	yes	yes	no	yes	yes	yes	yes	yes	no	yes	yes	no	yes	yes	yes	yes	yes	yes	no	no	no	yes	yes	yes	no	no	1
14	Lancaster et al., 2020	Early Speech and Language Development in Children With Nonsyndromic Cleft Lip and/or Palate: A Meta-Analysis	Journal of Speech, Language, and Hearing Research	2020	SMD	yes	no	yes	yes	yes	yes	no	yes	yes	yes	yes	yes	no	yes	yes	no	yes	yes	no	yes	yes	yes	yes	yes	yes	yes	yes	no	yes	yes	yes	yes	yes	yes	yes	no	yes	yes	no	yes	yes	yes	1
15	Weed & Fusaroli (2020)	Acoustic Measures of Prosody in Right-Hemisphere Damage: A Systematic Review and Meta-Analysis	Journal of Speech, Language, and Hearing Research	2020	SMD	no	no	yes	yes	no	yes	no	NA	yes	yes	yes	no	no	no	yes	no	no	no	no	no	no	yes	no	yes	yes	no	yes	no	yes	no	no	no	yes	no	no	no	no	no	yes	NA	yes	yes	1
16	Whitehouse, 2010	Is There a Sex Ratio Difference in the Familial Aggregation of Specific Language Impairment? A Meta-Analysis	Journal of Speech, Language, and Hearing Research	2010	Correlational	no	no	no	yes	NA	yes	no	yes	yes	yes	no	no	no	no	no	no	no	no	no	no	no	yes	no	yes	no	yes	no	no	no	no	no	no	yes	no	no	no	no	yes	no	no	no	no	1
17	Zimmerman (2018)	Do Infants Born Very Premature and Who Have Very Low Birth Weight Catch Up With Their Full Term Peers in Their Language Abilities by Early School Age?	Journal of Speech, Language, and Hearing Research	2018	SMD	no	no	no	yes	yes	yes	no	NA	yes	yes	no	yes	no	yes	yes	no	no	no	no	no	no	yes	yes	yes	no	no	no	yes	yes	yes	yes	no	yes	yes	yes	no	yes	yes	yes	NA	no	no	1
18	Roberts & Kaiser (2011)	The Effectiveness of Parent-Implemented Language Interventions: A Meta-Analysis	American Journal of Speech-Language Pathology	2011	SMD	yes	no	yes	yes	yes	yes	yes	no	yes	yes	yes	no	yes	yes	yes	yes	yes	yes	yes	yes	yes	yes	yes	yes	yes	yes	yes	yes	yes	yes	yes	yes	yes	no	no	no	no	yes	yes	yes	no	no	1
19	rojas et al., 2020	How Does Our Voice Change as We Age? A Systematic Review and Meta-Analysis of Acoustic and Perceptual Voice Data From Healthy Adults Over 50 Years of Age	Journal of Speech, Language, and Hearing Research	2020	SMD	yes	no	yes	yes	no	yes	no	yes	yes	yes	yes	yes	yes	yes	yes	yes	no	yes	yes	no	no	yes	no	yes	no	yes	no	no	yes	yes	yes	no	yes	yes	no	no	yes	yes	yes	yes	no	no	1
20	Rudoplh (2017)	Case History Risk Factors for Specific Language Impairment: A Systematic Review and Meta-Analysis	American Journal of Speech-Language Pathology	2017	Correlational	no	no	yes	yes	NA	yes	no	yes	yes	yes	yes	yes	no	yes	yes	yes	yes	yes	yes	yes	yes	yes	yes	yes	yes	yes	no	yes	yes	yes	yes	yes	yes	yes	no	no	yes	yes	yes	yes	no	no	1
21	Pauls et al. 2016	Executive Functions in Children With Specific Language Impairment: A Meta-Analysis	Journal of Speech, Language, and Hearing Research	2016	SMD	no	no	yes	yes	no	yes	yes	yes	yes	yes	no	yes	no	yes	yes	no	no	no	no	no	no	yes	yes	yes	yes	no	yes	no	yes	yes	yes	yes	yes	yes	no	no	no	yes	yes	yes	no	no	1
22	Orellana et al. 2019	The Use of Dynamic Assessment for the Diagnosis of Language Disorders in Bilingual Children: A Meta-Analysis	American Journal of Speech-Language Pathology	2019	Correlational	yes	no	yes	yes	NA	yes	no	no	yes	yes	yes	yes	no	yes	yes	yes	yes	no	no	yes	yes	yes	no	yes	no	yes	no	yes	yes	yes	yes	yes	yes	yes	no	no	no	yes	yes	yes	no	no	1
23	O'Neill et al., 2018	Effects of Interventions That Include Aided Augmentative and Alternative Communication Input on the Communication of Individuals With Complex Communication Needs: A Meta-Analysis	Journal of Speech, Language, and Hearing Research	2018	SMD	yes	no	yes	yes	yes	yes	yes	yes	yes	yes	no	no	no	yes	yes	yes	yes	yes	yes	yes	yes	yes	yes	no	no	yes	no	yes	yes	yes	yes	yes	yes	yes	yes	no	yes	yes	yes	yes	no	no	1
24	Ofoe et al., 2018	Short-Term Memory, Inhibition, and Attention in Developmental Stuttering: A Meta-Analysis	Journal of Speech, Language, and Hearing Research	2018	SMD	yes	no	no	yes	yes	yes	yes	yes	yes	yes	no	yes	yes	yes	yes	no	yes	yes	yes	no	no	yes	yes	yes	yes	yes	yes	no	yes	yes	yes	yes	yes	no	no	no	no	yes	yes	yes	no	no	1
25	Pawlowska (2014)	Evaluation of Three Proposed Markers for Language Impairment in English: A Meta-Analysis of Diagnostic Accuracy Studies	Journal of Speech, Language, and Hearing Research	2014	Correlational	no	no	yes	yes	NA	yes	no	NA	yes	yes	yes	no	no	yes	yes	no	yes	no	no	yes	yes	yes	NA	yes	no	yes	no	yes	yes	yes	yes	no	yes	no	no	no	yes	yes	yes	NA	no	no	1
26	Nye et al. (2013)	Behavioral Stuttering Interventions for Children and Adolescents: A Systematic Review and Meta-Analysis	Journal of Speech, Language, and Hearing Research	2013	SMD	no	no	yes	yes	yes	yes	yes	NA	yes	yes	no	yes	no	yes	yes	no	yes	yes	no	yes	no	yes	yes	yes	yes	yes	no	yes	yes	yes	yes	no	yes	no	no	no	no	yes	yes	NA	no	no	1
27	Ntourou et al. (2011)	Language Abilities of Children Who Stutter: A Meta-Analytical Review	American Journal of Speech-Language Pathology	2011	SMD	yes	no	yes	yes	no	yes	yes	yes	yes	yes	no	yes	no	yes	yes	no	yes	yes	yes	yes	yes	yes	yes	yes	yes	yes	yes	no	yes	yes	yes	no	yes	no	no	no	no	yes	yes	yes	no	no	1
28	Lum et al. (2015)	A Meta-Analysis of Cross Sectional Studies Investigating Language in Maltreated Children	Journal of Speech, Language, and Hearing Research	2015	SMD	yes	no	yes	yes	yes	yes	no	yes	yes	yes	yes	yes	yes	yes	yes	no	no	yes	yes	yes	no	yes	yes	yes	yes	yes	yes	yes	yes	yes	yes	yes	yes	yes	yes	no	no	yes	yes	yes	no	no	1
29	Leung et al. (2017)	Voice, Articulation, and Prosody Contribute to Listener Perceptions of Speaker Gender: A Systematic Review and Meta-Analysis	Journal of Speech, Language, and Hearing Research	2017	Correlational	yes	no	no	yes	NA	yes	yes	yes	yes	yes	no	yes	no	yes	yes	yes	yes	yes	no	yes	no	yes	no	yes	yes	yes	yes	yes	yes	yes	yes	yes	yes	yes	yes	no	no	no	yes	yes	no	no	1
30	Law et al. (2004)	The Efficacy of Treatment for Children With Developmental Speech and Language Delay/Disorder: A Meta-Analysis	Journal of Speech, Language, and Hearing Research	2004	SMD	yes	no	yes	yes	yes	yes	no	no	yes	no	no	no	yes	no	yes	no	yes	no	no	yes	yes	yes	yes	yes	yes	no	yes	yes	yes	no	yes	yes	yes	no	no	no	no	yes	yes	yes	no	no	1
31	Kleeck et al. (2010)	Should We Use Telegraphic or Grammatical Input in the Early Stages of Language Development With Children Who Have Language Impairments? A Meta-Analysis of the Research and Expert Opinion	American Journal of Speech-Language Pathology	2010	Correlational	no	no	no	yes	NA	yes	no	NA	yes	yes	no	no	no	no	yes	no	no	yes	yes	no	no	yes	no	yes	yes	yes	no	yes	yes	no	no	yes	yes	yes	no	no	yes	yes	yes	NA	no	no	1
32	Kan et al. (2010)	Word Learning in Children With Primary Language Impairment: A Meta-Analysis	Journal of Speech, Language, and Hearing Research	2010	SMD	yes	no	yes	yes	no	yes	no	yes	yes	yes	no	yes	no	no	no	no	no	no	no	yes	yes	yes	yes	yes	yes	no	no	yes	yes	no	no	no	yes	yes	no	no	yes	yes	no	yes	no	no	1
33	Jones & Brandt (2018)	Auditory Lexical Decisions in Developmental Language Disorder: A Meta-Analysis of Behavioral Studies	Journal of Speech, Language, and Hearing Research	2018	SMD	no	yes	yes	yes	no	yes	yes	yes	yes	yes	yes	yes	yes	yes	yes	yes	yes	no	no	yes	yes	yes	yes	yes	no	yes	yes	yes	yes	yes	yes	yes	yes	yes	yes	yes	yes	yes	yes	yes	yes	yes	1
34	Hopkins-Rossabi et al. (2018)	Respiratory Phase and Lung Volume Patterns During Swallowing in Healthy Adults: A Systematic Review and Meta-Analysis	Journal of Speech, Language, and Hearing Research	2018	Correlational	yes	yes	no	yes	NA	yes	yes	no	yes	yes	yes	yes	no	yes	yes	no	yes	yes	no	yes	yes	yes	yes	yes	no	yes	yes	yes	yes	yes	yes	yes	yes	yes	no	no	no	yes	no	yes	no	no	1
35	Hearnshaw et al. (2019)	Speech Perception Skills of Children With Speech Sound Disorders: A Systematic Review and Meta-Analysis	Journal of Speech, Language, and Hearing Research	2019	SMD	yes	yes	no	yes	yes	yes	no	NA	yes	yes	yes	yes	no	yes	yes	no	yes	yes	no	no	no	yes	no	yes	yes	no	no	yes	yes	yes	yes	yes	yes	yes	yes	yes	yes	no	yes	NA	no	no	1
36	Gallinat et al. (2014)	Differences in the Performance of Children With Specific Language Impairment and Their Typically Developing Peers on Nonverbal Cognitive Tests: A Meta-Analysis	Journal of Speech, Language, and Hearing Research	2014	SMD	no	no	yes	yes	no	yes	yes	yes	yes	yes	yes	yes	no	no	yes	no	yes	no	no	yes	yes	yes	yes	yes	yes	no	yes	no	yes	no	yes	no	yes	yes	no	no	yes	yes	yes	yes	no	no	1
37	Flippin et al. (2010)	Effectiveness of the Picture Exchange Communication System (PECS) on Communication and Speech for Children With Autism Spectrum Disorders: A Meta-Analysis	American Journal of Speech-Language Pathology	2010	SMD	no	no	yes	yes	yes	yes	no	NA	yes	yes	yes	yes	no	no	yes	no	yes	yes	yes	no	no	yes	yes	no	yes	yes	no	yes	yes	no	yes	no	yes	no	no	no	yes	yes	yes	NA	no	no	1
38	Estes et al. (2007)	Differences in the Nonword Repetition Performance of Children With and Without Specific Language Impairment: A Meta-Analysis	Journal of Speech, Language, and Hearing Research	2007	SMD	yes	no	yes	yes	no	yes	yes	yes	yes	yes	no	no	yes	no	no	no	yes	no	no	yes	yes	yes	yes	yes	yes	yes	no	no	yes	no	no	no	yes	no	no	no	yes	yes	yes	yes	no	no	1
39	Ebert et al. (2011)	Sustained Attention in Children With Primary Language Impairment: A Meta-Analysis	Journal of Speech, Language, and Hearing Research	2011	SMD	yes	no	yes	yes	no	yes	yes	yes	yes	yes	yes	no	no	yes	yes	no	no	yes	yes	no	no	yes	no	yes	yes	yes	no	no	yes	yes	yes	no	yes	no	no	no	no	yes	yes	yes	no	no	1
40	Duchesne & Marschark (2019)	Effects of Age at Cochlear Implantation on Vocabulary and Grammar: A Review of the Evidence	American Journal of Speech-Language Pathology	2019	SMD	no	no	yes	yes	no	yes	no	no	yes	yes	no	yes	no	no	no	no	no	no	no	no	no	yes	no	no	no	no	no	no	yes	no	no	no	yes	no	no	no	no	yes	yes	yes	no	no	1
41	Dollaghan & Horner (2011)	Bilingual Language Assessment:A Meta-Analysis of Diagnostic Accuracy	Journal of Speech, Language, and Hearing Research	2011	Correlational	no	no	no	yes	NA	yes	no	NA	yes	yes	yes	yes	no	yes	yes	no	yes	yes	yes	yes	no	yes	NA	yes	no	yes	no	yes	yes	yes	yes	yes	yes	yes	no	no	yes	yes	yes	NA	no	no	1
42	Casby (2001)	Otitis Media and Language Development: A Meta-Analysis	American Journal of Speech-Language Pathology	2001	SMD	yes	no	no	yes	yes	yes	no	NA	yes	yes	no	yes	no	no	no	no	yes	no	no	yes	yes	yes	no	no	no	no	no	no	yes	no	no	no	yes	no	no	no	no	yes	yes	NA	no	no	1
43	Boutsen et al. (2002)	Botox Treatment in Adductor Spasmodic Dysphonia: A Meta-Analysis	Journal of Speech, Language, and Hearing Research	2002	SMD	yes	no	yes	yes	yes	yes	no	yes	no	no	no	yes	no	no	no	no	no	no	no	no	no	yes	no	no	no	no	no	no	no	no	no	no	yes	no	no	no	yes	no	no	no	no	no	1
44	Bailey et al. (2015)	Sound Production Treatment: Synthesis and Quantification of Outcomes	American Journal of Speech-Language Pathology	2015	SMD	yes	no	yes	yes	yes	yes	yes	yes	yes	no	no	no	yes	no	no	yes	no	yes	yes	yes	no	yes	yes	yes	yes	yes	no	yes	no	no	no	yes	yes	no	yes	no	yes	yes	yes	yes	no	no	1
45	Singer et al. (2020)	Clinical Characteristics Associated With Stuttering Persistence: A Meta-Analysis	Journal of Speech, Language, and Hearing Research	2020	SMD	yes	yes	yes	yes	no	yes	yes	yes	yes	yes	yes	yes	yes	yes	yes	no	yes	yes	yes	no	no	yes	yes	yes	yes	no	yes	yes	yes	yes	yes	yes	yes	yes	yes	no	no	yes	yes	yes	no	no	1
46	Yao et al. (2020)	Low-Frequency Repetitive Transcranial Magnetic Stimulation in Patients With Poststroke Aphasia: Systematic Review and Meta-Analysis of Its Effect Upon Communication	Journal of Speech, Language, and Hearing Research	2020	SMD	yes	no	yes	yes	yes	yes	no	no	yes	yes	yes	yes	no	yes	yes	no	yes	yes	no	yes	no	yes	no	yes	no	yes	no	yes	yes	yes	yes	yes	yes	yes	no	no	yes	yes	yes	yes	no	no	1
47	Zhao et al. (2020)	A Meta-Analysis of the Association Between the Voice Handicap Index and Objective Voice Analysis	Journal of Speech, Language, and Hearing Research	2020	Correlational	no	no	no	yes	no	yes	no	N/A	yes	yes	yes	yes	yes	yes	yes	no	yes	yes	no	yes	no	yes	no	yes	yes	yes	yes	yes	yes	yes	yes	yes	yes	yes	yes	no	yes	yes	no	N/A	no	no	1
