# Supplementary material
Source: publisher figshare collection journal article supplement (https://asha.figshare.com/articles/dataset/_/14888481)
Supplement: Supplementary file 1 [file 1]

**Supplemental Material S3. Coding manual.**

| <b>Code Category</b>                  | <b>Code</b>                    | <b>Code Description</b>                                                                                                                                                                                         |
|---------------------------------------|--------------------------------|-----------------------------------------------------------------------------------------------------------------------------------------------------------------------------------------------------------------|
| <b>Study Information</b>              | Authors                        | All authors listed                                                                                                                                                                                              |
|                                       | Title                          | Title of journal article                                                                                                                                                                                        |
|                                       | Journal                        | Journal where published                                                                                                                                                                                         |
|                                       | Year                           | Year of publication                                                                                                                                                                                             |
|                                       | Meta-analysis Type             | SMD: Effect size demonstrates the difference between groups<br>Correlational: Effect size represents the correlation across variables<br>Both: Examined both group differences and correlation across variables |
|                                       | Funding                        | Reported that the project received funding                                                                                                                                                                      |
|                                       | Registered                     | Reported that the project was preregistered online on platforms such as PROSPERO or Open Science Framework                                                                                                      |
| <b>Eligibility Criteria</b>           | Design Type                    | Reported the study designs eligible for inclusion                                                                                                                                                               |
|                                       | Population                     | Reported the population characteristics eligible for inclusion                                                                                                                                                  |
|                                       | Intervention                   | Reported the interventions eligible for inclusion (only for SMD meta-analyses)                                                                                                                                  |
|                                       | Outcomes                       | Reported outcome variables eligible for inclusion                                                                                                                                                               |
|                                       | Grey Literature                | Reported if grey literature was intentionally searched                                                                                                                                                          |
| <b>Moderators</b>                     | Justification                  | All moderators were justified with literature prior to investigation                                                                                                                                            |
| <b>Search Strategy</b>                | Databases                      | Reported all databases that were searched                                                                                                                                                                       |
|                                       | Terms                          | Reported all terms that were searched (for at least 1 database)                                                                                                                                                 |
|                                       | Strings                        | Reported the actual string of terms that was searched (for at least one database)                                                                                                                               |
|                                       | Dates                          | Provided explicit search date time frame or the date when the search was conducted if no limit on search dates was imposed                                                                                      |
|                                       | Missing Data                   | Reported contacting authors for additional / missing information                                                                                                                                                |
| <b>Screening and Coding Processes</b> | Abstract                       | Reported on the abstract screening process                                                                                                                                                                      |
|                                       | Full text                      | Reported on the full-text screening process                                                                                                                                                                     |
|                                       | Coding manual                  | Provided details about the coding manual                                                                                                                                                                        |
|                                       | Coding process                 | Provided details about the coding process                                                                                                                                                                       |
|                                       | Screening Reliability Process  | Reported on the reliability process during screening                                                                                                                                                            |
|                                       | Screening Reliability Estimate | Reported the exact reliability estimate for the screening process                                                                                                                                               |
|                                       | Coding Reliability Process     | Reported on the reliability process during coding                                                                                                                                                               |
|                                       | Coding Reliability Estimate    | Reported the exact reliability estimate for the coding process                                                                                                                                                  |

| <b>Code Category</b>      | <b>Code</b>               | <b>Code Description</b>                                                                                                |
|---------------------------|---------------------------|------------------------------------------------------------------------------------------------------------------------|
| <b>Analytic Strategy</b>  | Metric                    | Reported the exact effect size metrics that were used                                                                  |
|                           | Dependency                | Discussed how dependent data points were addressed                                                                     |
|                           | Synthesis                 | Reported whether a random or fixed effect model was used                                                               |
|                           | Weights                   | Reported whether and/or how the model was weighted                                                                     |
|                           | ES Extraction             | Described the process for effect size extraction over and above the primary effect size metric                         |
| <b>Assessment of Bias</b> | Publication Bias          | Described whether and/or how publication bias was assessed                                                             |
|                           | Risk of Bias              | Described whether and/or how risk of bias was assessed                                                                 |
| <b>Search Results</b>     | Number Searched           | Reported the total number of studies screened                                                                          |
|                           | Number Abstract           | Reported the total number of abstracts screened                                                                        |
|                           | Number Full Text          | Reported the total number of studies screened by full-text                                                             |
|                           | Number Extra              | Reported the total number of studies found outside of the database searches (i.e., hand searches, contacting authors). |
|                           | Number Final              | Reported the final number of studies after all screening was finished                                                  |
|                           | PRISMA Chart              | Authors published their PRISMA search flow chart                                                                       |
|                           | PRISMA Citation           | Authors cited the PRISMA checklist                                                                                     |
|                           | PRISMA Checklist          | Authors published the PRISMA checklist for their study                                                                 |
| <b>Summary Statistics</b> | Aggregate Sample Size     | Provided the overall sample size for all included studies                                                              |
|                           | Moderator Data            | Reported the moderator data for each individual study                                                                  |
|                           | Individual Sample Size    | Reported the sample size of each individual study                                                                      |
|                           | Individual Effect Size    | Reported the effect size of each individual study                                                                      |
| <b>Reproducibility</b>    | Data Provided             | Published the applicable data                                                                                          |
|                           | Statistical Code Provided | Published the applicable statistical code                                                                              |

*Note.* We coded each of these indicators as yes/no/not applicable (NA). We used NA in instances where the study design did not require authors to report on a certain criteria.
