# Supplementary material
Source: publisher figshare collection journal article supplement (https://asha.figshare.com/articles/dataset/_/14888481)
Supplement: Supplementary file 2 [file 1]

**Supplemental Material S4.** Decision rules for some complicated coding variables.

| <b>Coding Variable</b>  | <b>Coding Decision</b> | <b>Systematic Decision Rule</b>                                                                                                                                        | <b>Example</b>                                                                                                                                                                                                                                                        |
|-------------------------|------------------------|------------------------------------------------------------------------------------------------------------------------------------------------------------------------|-----------------------------------------------------------------------------------------------------------------------------------------------------------------------------------------------------------------------------------------------------------------------|
| Search String           | Yes                    | Reported the replicable combinations of search terms with the exact Boolean operators                                                                                  | <i>“SLI” OR “specific language impairment” OR “specific-language impairment” OR “language impairment” OR “language delay”...</i>                                                                                                                                      |
|                         | No                     | Reported only keywords without the exact Boolean operators rendering the search non-replicable                                                                         | <i>The keywords used in the search were <b>otitis media and language</b>.</i>                                                                                                                                                                                         |
| Search Dates            | Yes                    | Reported the specific range of publication dates to which the search was restricted, or the date when the search was conducted if no limit on search dates was imposed | <i>In total, 28 different electronic databases were used to search relevant scientific reports in English, German, and Dutch from the years 1960 to 2013.</i>                                                                                                         |
|                         | No                     | Reported no specific date restriction or the date when the search was conducted if no limit on search dates was imposed                                                | <i>The final electronic search was completed on November 16, 2017.</i>                                                                                                                                                                                                |
| Moderator Justification | Yes                    | Provided a theoretical justification in the introduction section for all the moderators that motivated the moderator analysis                                          | <i>Study-Level Moderator Variables: Nonverbal IQ Test, Nonverbal IQ Cutoff Score; Participant-Level Moderator Variables: Age, SES (subsection headings in the introduction)</i>                                                                                       |
|                         | No                     | Provided no theoretical justification for any of the moderators that were included in the analysis, or only for some of the moderators                                 | <i>The authors did not provide theoretical rationale for the moderators that were included in the analysis (i.e., intervention agent, type of recast, participant characteristics, dosage, recast-only versus package interventions) in the introduction section.</i> |
|                         | NA                     | No moderator analysis was conducted in the study                                                                                                                       | <i>The study examined the main effect of children’s low birth weight or preterm on later language abilities without any exploration of moderators.</i>                                                                                                                |
| Dependency              | Yes                    | Discussed how the dependent effect sizes (i.e., data from the same sample) were addressed                                                                              | <i>To address this violation, we used RVE to account for the within-study dependence of effects.</i>                                                                                                                                                                  |
|                         | No                     | No reporting of either if and/or how the effect size dependency was addressed                                                                                          | <i>The authors did not mention how the issue caused by the dependent data from the same sample on participants’ speech perception was addressed.</i>                                                                                                                  |
|                         | NA                     | Only one effect size existed in each study (no concern of the dependency issue)                                                                                        |                                                                                                                                                                                                                                                                       |
