# Supplementary material
Source: publisher figshare collection journal article supplement (https://asha.figshare.com/articles/dataset/_/14888481)
Supplement: Supplementary file 3 [file 1]

**Supplemental Material S1.** References of the included studies.

| Study # | Reference                                                                                                                                                                                                                                                                                                                                                                                         |
|---------|---------------------------------------------------------------------------------------------------------------------------------------------------------------------------------------------------------------------------------------------------------------------------------------------------------------------------------------------------------------------------------------------------|
| 1       | Bailey, D. J., Eatchel, K., & Wambaugh, J. (2015). Sound production treatment: Synthesis and quantification of outcomes. <i>American Journal of Speech-Language Pathology</i> , 24(4), 798-814. <a href="https://doi.org/10.1044/2015_AJSLP-14-0127">https://doi.org/10.1044/2015_AJSLP-14-0127</a>                                                                                               |
| 2       | Boutsen, F., Cannito, M. P., Taylor, M., & Bender, B. (2002). Botox treatment in adductor spasmodic dysphonia: A meta-analysis. <i>Journal of Speech, Language, and Hearing Research</i> , 45(3), 469-481. <a href="https://doi.org/10.1044/1092-4388(2002/037)">https://doi.org/10.1044/1092-4388(2002/037)</a>                                                                                  |
| 3       | Casby, M. W. (2001). Otitis media and language development: A meta-analysis. <i>American Journal of Speech-Language Pathology</i> , 10(1), 65-80. <a href="https://doi.org/10.1044/1058-0360(2001/009)">https://doi.org/10.1044/1058-0360(2001/009)</a>                                                                                                                                           |
| 4       | Cleave, P. L., Becker, S. D., Curran, M., Van Horne, A. O., & Fey, M. E. (2015). The efficacy of recasts in language intervention: A systematic review and meta-analysis. <i>American Journal of Speech-Language Pathology</i> , 24(2), 237-255. <a href="https://doi.org/10.1044/2015_AJSLP-14-0105">https://doi.org/10.1044/2015_AJSLP-14-0105</a>                                              |
| 5       | Cristia, A., Bulgarelli, F., & Bergelson, E. (2020). Accuracy of the language environment analysis system segmentation and metrics: A systematic review. <i>Journal of Speech, Language, and Hearing Research</i> , 63(4), 1093-1105. <a href="https://doi.org/10.1044/2020_JSLHR-19-00017">https://doi.org/10.1044/2020_JSLHR-19-00017</a>                                                       |
| 6       | Dollaghan, C. A., & Horner, E. A. (2011). Bilingual language assessment: A meta-analysis of diagnostic accuracy. <i>Journal of Speech, Language, and Hearing Research</i> , 54(4), 1077-1088. <a href="https://doi.org/10.1044/1092-4388(2010/10-0093)">https://doi.org/10.1044/1092-4388(2010/10-0093)</a>                                                                                       |
| 7       | Duchesne, L., & Marschark, M. (2019). Effects of age at cochlear implantation on vocabulary and grammar: A review of the evidence. <i>American Journal of Speech-Language Pathology</i> , 28(4), 1673-1691. <a href="https://doi.org/10.1044/2019_AJSLP-18-0161">https://doi.org/10.1044/2019_AJSLP-18-0161</a>                                                                                   |
| 8       | Ebert, K. D., & Kohnert, K. (2011). Sustained attention in children with primary language impairment: A meta-analysis. <i>Journal of Speech, Language, and Hearing Research</i> , 54(5), 1372-1384. <a href="https://doi.org/10.1044/1092-4388(2011/10-0231)">https://doi.org/10.1044/1092-4388(2011/10-0231)</a>                                                                                 |
| 9       | Estes, K. G., Evans, J. L., & Else-Quest, N. M. (2007). Differences in the nonword repetition performance of children with and without specific language impairment: A meta-analysis. <i>Journal of Speech, Language, and Hearing Research</i> , 50(1), 177-195. <a href="https://doi.org/10.1044/1092-4388(2007/015)">https://doi.org/10.1044/1092-4388(2007/015)</a>                            |
| 10      | Fisher, E. L. (2017). A systematic review and meta-analysis of predictors of expressive-language outcomes among late talkers. <i>Journal of Speech, Language, and Hearing Research</i> , 60(10), 2935-2948. <a href="https://doi.org/10.1044/2017_JSLHR-L-16-0310">https://doi.org/10.1044/2017_JSLHR-L-16-0310</a>                                                                               |
| 11      | Flippin, M., Reszka, S., & Watson, L. R. (2010). Effectiveness of the Picture Exchange Communication System (PECS) on communication and speech for children with autism spectrum disorders: A meta-analysis. <i>American Journal of Speech-Language Pathology</i> , 19(2), 178-195. <a href="https://doi.org/10.1044/1058-0360(2010/09-0022)">https://doi.org/10.1044/1058-0360(2010/09-0022)</a> |
| 12      | Gallinat, E., & Spaulding, T. J. (2014). Differences in the performance of children with specific language impairment and their typically developing peers on nonverbal cognitive tests: A meta-analysis. <i>Journal of Speech, Language, and Hearing Research</i> , 57(4), 1363-1382. <a href="https://doi.org/10.1044/2014_JSLHR-L-12-0363">https://doi.org/10.1044/2014_JSLHR-L-12-0363</a>    |
| 13      | Gatlin, B., & Wanzek, J. (2015). Relations among children's use of dialect and literacy skills: A meta-analysis. <i>Journal of Speech, Language, and Hearing Research</i> , 58(4), 1306-1318. <a href="https://doi.org/10.1044/2015_JSLHR-L-14-0311">https://doi.org/10.1044/2015_JSLHR-L-14-0311</a>                                                                                             |
| 14      | Hearnshaw, S., Baker, E., & Munro, N. (2019). Speech perception skills of children with speech sound disorders: A systematic review and meta-analysis. <i>Journal of Speech,</i>                                                                                                                                                                                                                  |

|    |                                                                                                                                                                                                                                                                                                                                                                                                                     |
|----|---------------------------------------------------------------------------------------------------------------------------------------------------------------------------------------------------------------------------------------------------------------------------------------------------------------------------------------------------------------------------------------------------------------------|
|    | <i>Language, and Hearing Research</i> , 62(10), 3771-3789.<br><a href="https://doi.org/10.1044/2019_JSLHR-S-18-0519">https://doi.org/10.1044/2019_JSLHR-S-18-0519</a>                                                                                                                                                                                                                                               |
| 15 | Hopkins-Rossabi, T., Curtis, P., Temenak, M., Miller, C., & Martin-Harris, B. (2019). Respiratory phase and lung volume patterns during swallowing in healthy adults: A systematic review and meta-analysis. <i>Journal of Speech, Language, and Hearing Research</i> , 62(4), 868-882. <a href="https://doi.org/10.1044/2018_JSLHR-S-18-0323">https://doi.org/10.1044/2018_JSLHR-S-18-0323</a>                     |
| 16 | Jones, S. D., & Brandt, S. (2018). Auditory lexical decisions in developmental language disorder: A meta-analysis of behavioral studies. <i>Journal of Speech, Language, and Hearing Research</i> , 61(7), 1766-1783. <a href="https://doi.org/10.1044/2018_JSLHR-L-17-0447">https://doi.org/10.1044/2018_JSLHR-L-17-0447</a>                                                                                       |
| 17 | Kan, P. F., & Windsor, J. (2010). Word learning in children with primary language impairment: A meta-analysis. <i>Journal of Speech, Language, and Hearing Research</i> , 53(3), 739-756. <a href="https://doi.org/10.1044/1092-4388(2009/08-0248)">https://doi.org/10.1044/1092-4388(2009/08-0248)</a>                                                                                                             |
| 18 | Krok, W. C., & Leonard, L. B. (2015). Past tense production in children with and without specific language impairment across Germanic languages: A meta-analysis. <i>Journal of Speech, Language, and Hearing Research</i> , 58(4), 1326-1340. <a href="https://doi.org/10.1044/2015_JSLHR-L-14-0348">https://doi.org/10.1044/2015_JSLHR-L-14-0348</a>                                                              |
| 19 | Lammertink, I., Boersma, P., Wijnen, F., & Rispens, J. (2017). Statistical learning in specific language impairment: A meta-analysis. <i>Journal of Speech, Language, and Hearing Research</i> , 60(12), 3474-3486. <a href="https://doi.org/10.1044/2017_JSLHR-L-16-0439">https://doi.org/10.1044/2017_JSLHR-L-16-0439</a>                                                                                         |
| 20 | Lancaster, H. S., Lien, K. M., Chow, J. C., Frey, J. R., Scherer, N. J., & Kaiser, A. P. (2020). Early speech and language development in children with nonsyndromic cleft lip and/or palate: A meta-analysis. <i>Journal of Speech, Language, and Hearing Research</i> , 63(1), 14-31. <a href="https://doi.org/10.1044/2019_JSLHR-19-00162">https://doi.org/10.1044/2019_JSLHR-19-00162</a>                       |
| 21 | Law, J., Garrett, Z., & Nye, C. (2004). The efficacy of treatment for children with developmental speech and language delay/disorder. <i>Journal of Speech, Language, and Hearing Research</i> , 47(4), 924-943. <a href="https://doi.org/10.1044/1092-4388(2004/069)">https://doi.org/10.1044/1092-4388(2004/069)</a>                                                                                              |
| 22 | Leung, Y., Oates, J., & Chan, S. P. (2018). Voice, articulation, and prosody contribute to listener perceptions of speaker gender: A systematic review and meta-analysis. <i>Journal of Speech, Language, and Hearing Research</i> , 61(2), 266-297. <a href="https://doi.org/10.1044/2017_JSLHR-S-17-0067">https://doi.org/10.1044/2017_JSLHR-S-17-0067</a>                                                        |
| 23 | Lum, J. A. G., Powell, M., Timms, L., & Snow, P. (2015). A meta-analysis of cross sectional studies investigating language in maltreated children. <i>Journal of Speech, Language, and Hearing Research</i> , 58(3), 961-976. <a href="https://doi.org/10.1044/2015_JSLHR-L-14-0056">https://doi.org/10.1044/2015_JSLHR-L-14-0056</a>                                                                               |
| 24 | Ntourou, K., Conture, E. G., & Lipsey, M. W. (2011). Language abilities of children who stutter: A meta-analytical review. <i>American Journal of Speech-Language Pathology</i> , 24(4), 163-179. <a href="https://doi.org/10.1044/1058-0360(2011/09-0102)">https://doi.org/10.1044/1058-0360(2011/09-0102)</a>                                                                                                     |
| 25 | Nye, C., Vanryckeghem, M., Schwartz, J. B., Herder, C., Turner, H. M., & Howard, C. (2013). Behavioral stuttering interventions for children and adolescents: A systematic review and meta-analysis. <i>Journal of Speech, Language, and Hearing Research</i> , 56(3), 921-932. <a href="https://doi.org/10.1044/1092-4388(2012/12-0036)">https://doi.org/10.1044/1092-4388(2012/12-0036)</a>                       |
| 26 | Ofoe, L. C., Anderson, J. D., & Ntourou, K. (2018). Short-term memory, inhibition, and attention in developmental stuttering: A meta-analysis. <i>Journal of Speech, Language, and Hearing Research</i> , 61(7), 1626-1648. <a href="https://doi.org/10.1044/2018_JSLHR-S-17-0372">https://doi.org/10.1044/2018_JSLHR-S-17-0372</a>                                                                                 |
| 27 | O'Neill, T., Light, J., & Pope, L. (2018). Effects of interventions that include aided augmentative and alternative communication input on the communication of individuals with complex communication needs: A meta-analysis. <i>Journal of Speech, Language, and Hearing Research</i> , 61(7), 1743-1765. <a href="https://doi.org/10.1044/2018_JSLHR-L-17-0132">https://doi.org/10.1044/2018_JSLHR-L-17-0132</a> |
| 28 | Orellana, C. I., Wada, R., & Gillam, R. B. (2019). The use of dynamic assessment for the diagnosis of language disorders in bilingual children: A meta-analysis. <i>American Journal</i>                                                                                                                                                                                                                            |

|    |                                                                                                                                                                                                                                                                                                                                                                                                               |
|----|---------------------------------------------------------------------------------------------------------------------------------------------------------------------------------------------------------------------------------------------------------------------------------------------------------------------------------------------------------------------------------------------------------------|
|    | <i>of Speech-Language Pathology</i> , 28(3), 1298-1317. <a href="https://doi.org/10.1044/2019_AJSLP-18-0202">https://doi.org/10.1044/2019_AJSLP-18-0202</a>                                                                                                                                                                                                                                                   |
| 29 | Pauls, L. J., & Archibald, L. M. (2016). Executive functions in children with specific language impairment: A meta-analysis. <i>Journal of Speech, Language, and Hearing Research</i> , 59(5), 1074-1086. <a href="https://doi.org/10.1044/2016_JSLHR-L-15-0174">https://doi.org/10.1044/2016_JSLHR-L-15-0174</a>                                                                                             |
| 30 | Pawłowska, M. (2014). Evaluation of three proposed markers for language impairment in English: A meta-analysis of diagnostic accuracy studies. <i>Journal of Speech, Language, and Hearing Research</i> , 57(6), 2261-2273. <a href="https://doi.org/10.1044/2014_JSLHR-L-13-0189">https://doi.org/10.1044/2014_JSLHR-L-13-0189</a>                                                                           |
| 31 | Quique, Y. M., Evans, W. S., & Dickey, M. W. (2019). Acquisition and generalization responses in aphasia naming treatment: A meta-analysis of semantic feature analysis outcomes. <i>American Journal of Speech-Language Pathology</i> , 28(1S), 230-246. <a href="https://doi.org/10.1044/2018_AJSLP-17-0155">https://doi.org/10.1044/2018_AJSLP-17-0155</a>                                                 |
| 32 | Roberts, M. Y., & Kaiser, A. P. (2011). The effectiveness of parent-implemented language interventions: A meta-analysis. <i>American Journal of Speech-Language Pathology</i> , 20(3), 180-199. <a href="https://doi.org/10.1044/1058-0360(2011/10-0055)">https://doi.org/10.1044/1058-0360(2011/10-0055)</a>                                                                                                 |
| 33 | Rødsvik, A. K., Torkildsen, J. K., Wie, O. B., Storaker, M. A., & Silvola, J. T. (2018). Consonant and vowel identification in cochlear implant users measured by nonsense words: A systematic review and meta-analysis. <i>Journal of Speech, Language, and Hearing Research</i> , 61(4), 1023-1050. <a href="https://doi.org/10.1044/2018_JSLHR-H-16-0463">https://doi.org/10.1044/2018_JSLHR-H-16-0463</a> |
| 34 | Rojas, S., Kefalianos, E., & Vogel, A. (2020). How does our voice change as we age? A systematic review and meta-analysis of acoustic and perceptual voice data from healthy adults over 50 years of age. <i>Journal of Speech, Language, and Hearing Research</i> , 63(2), 533-551. <a href="https://doi.org/10.1044/2019_JSLHR-19-00099">https://doi.org/10.1044/2019_JSLHR-19-00099</a>                    |
| 35 | Rudolph, J. M. (2017). Case history risk factors for specific language impairment: A systematic review and meta-analysis. <i>American Journal of Speech-Language Pathology</i> , 26(3), 991-1010. <a href="https://doi.org/10.1044/2016_AJSLP-15-0181">https://doi.org/10.1044/2016_AJSLP-15-0181</a>                                                                                                         |
| 36 | Sandbank, M., Bottema-Beutel, K., Crowley, S., Cassidy, M., Feldman, J. I., Canihuante, M., & Woynaroski, T. (2020). Intervention effects on language in children with autism: A Project AIM meta-analysis. <i>Journal of Speech, Language, and Hearing Research</i> , 63(5), 1537-1560. <a href="https://doi.org/10.1044/2020_JSLHR-19-00167">https://doi.org/10.1044/2020_JSLHR-19-00167</a>                |
| 37 | Sandbank, M., & Yoder, P. (2016). The association between parental mean length of utterance and language outcomes in children with disabilities: A correlational meta-analysis. <i>American Journal of Speech-Language Pathology</i> , 25(2), 240-251. <a href="https://doi.org/10.1044/2015_AJSLP-15-0003">https://doi.org/10.1044/2015_AJSLP-15-0003</a>                                                    |
| 38 | Scott, K. A., Roberts, J. A., & Glennen, S. (2011). How well do children who are internationally adopted acquire language? A meta-analysis. <i>Journal of Speech, Language, and Hearing Research</i> , 54(4), 1153-1169. <a href="https://doi.org/10.1044/1092-4388(2010/10-0075)">https://doi.org/10.1044/1092-4388(2010/10-0075)</a>                                                                        |
| 39 | Singer, C. M., Hessling, A., Kelly, E. M., Singer, L., & Jones, R. M. (2020). Clinical characteristics associated with stuttering persistence: A meta-analysis. <i>Journal of Speech, Language, and Hearing Research</i> , 63(9), 2995-3018. <a href="https://doi.org/10.1044/2020_JSLHR-20-00096">https://doi.org/10.1044/2020_JSLHR-20-00096</a>                                                            |
| 40 | Systad, S., Bjørnvold, M., Sørensen, C., & Lyster, S. A. H. (2019). The value of electroencephalogram in assessing children with speech and language impairments. <i>Journal of Speech, Language, and Hearing Research</i> , 62(1), 153-168. <a href="https://doi.org/10.1044/2018_JSLHR-L-17-0087">https://doi.org/10.1044/2018_JSLHR-L-17-0087</a>                                                          |
| 41 | v. Latoszek, B. B., Maryn, Y., Gerrits, E., & De Bodt, M. (2018). A meta-analysis: acoustic measurement of roughness and breathiness. <i>Journal of Speech, Language, and Hearing Research</i> , 61(2), 298-323. <a href="https://doi.org/10.1044/2017_JSLHR-S-16-0188">https://doi.org/10.1044/2017_JSLHR-S-16-0188</a>                                                                                      |

|    |                                                                                                                                                                                                                                                                                                                                                                                                                                                                       |
|----|-----------------------------------------------------------------------------------------------------------------------------------------------------------------------------------------------------------------------------------------------------------------------------------------------------------------------------------------------------------------------------------------------------------------------------------------------------------------------|
| 42 | van Kleeck, A., Schwarz, A. L., Fey, M., Kaiser, A., Miller, J., & Weitzman, E. (2010). Should we use telegraphic or grammatical input in the early stages of language development with children who have language impairments? A meta-analysis of the research and expert opinion. <i>American Journal of Speech-Language Pathology</i> , 19(1), 3-21. <a href="https://doi.org/10.1044/1058-0360(2009/08-0075)">https://doi.org/10.1044/1058-0360(2009/08-0075)</a> |
| 43 | Weed, E., & Fusaroli, R. (2020). Acoustic measures of prosody in right-hemisphere damage: A systematic review and meta-analysis. <i>Journal of Speech, Language, and Hearing Research</i> , 63(6), 1762-1775. <a href="https://doi.org/10.1044/2020_JSLHR-19-00241">https://doi.org/10.1044/2020_JSLHR-19-00241</a>                                                                                                                                                   |
| 44 | Whitehouse, A. J. O. (2010). Is there a sex ratio difference in the familial aggregation of specific language impairment? A meta-analysis. <i>Journal of Speech, Language, and Hearing Research</i> , 53(4), 1015-1025. <a href="https://doi.org/10.1044/1092-4388(2009/09-0078)">https://doi.org/10.1044/1092-4388(2009/09-0078)</a>                                                                                                                                 |
| 45 | Yao, L., Zhao, H., Shen, C., Liu, F., Qiu, L., & Fu, L. (2020). Low-frequency repetitive transcranial magnetic stimulation in patients with poststroke aphasia: Systematic review and meta-analysis of its effect upon communication. <i>Journal of Speech, Language, and Hearing Research</i> , 63(11), 3801-3815. <a href="https://doi.org/10.1044/2020_JSLHR-19-00077">https://doi.org/10.1044/2020_JSLHR-19-00077</a>                                             |
| 46 | Zhao, E. E., Nguyen, S. A., Salvador, C. D., & O'Rourke, A. K. (2020). A meta-analysis of the association between the voice handicap index and objective voice analysis. <i>Journal of Speech, Language, and Hearing Research</i> , 63(10), 3461-3471. <a href="https://doi.org/10.1044/2020_JSLHR-20-00209">https://doi.org/10.1044/2020_JSLHR-20-00209</a>                                                                                                          |
| 47 | Zimmerman, E. (2018). Do infants born very premature and who have very low birth weight catch up with their full term peers in their language abilities by early school age? <i>Journal of Speech, Language, and Hearing Research</i> , 61(1), 53-65. <a href="https://doi.org/10.1044/2017_JSLHR-L-16-0150">https://doi.org/10.1044/2017_JSLHR-L-16-0150</a>                                                                                                         |
