# Supplementary material
Source: publisher figshare collection journal article supplement (https://asha.figshare.com/articles/dataset/_/14888481)
Supplement: Supplementary file 4 [file 1]

**Supplemental Material S2.** Summary of included studies.

| <b>Author (year)</b>          | <b>Title</b>                                                                                                                                                    | <b>Journal</b> | <b>Meta Type</b> | <b>Registered</b> | <b>Data Provided</b> | <b>Statistical Code Provided</b> |
|-------------------------------|-----------------------------------------------------------------------------------------------------------------------------------------------------------------|----------------|------------------|-------------------|----------------------|----------------------------------|
| Bailey et al. (2015)          | Sound Production Treatment: Synthesis and Quantification of Outcomes                                                                                            | AJSLP          | SMD              | no                | no                   | no                               |
| Boutsen et al. (2002)         | Botox Treatment in Adductor Spasmodic Dysphonia: A Meta-Analysis                                                                                                | JSLHR          | SMD              | no                | no                   | no                               |
| Casby (2001)                  | Otitis Media and Language Development: A Meta-Analysis                                                                                                          | AJSLP          | SMD              | no                | no                   | no                               |
| Cleave et al. (2015)          | The Efficacy of Recasts in Language Intervention: A Systematic Review and Meta-Analysis                                                                         | AJSLP          | SMD              | no                | no                   | no                               |
| Cristia et al. (2019)         | Accuracy of the Language Environment Analysis System Segmentation and Metrics: A Systematic Review                                                              | JSLHR          | Corr             | no                | yes                  | yes                              |
| Dollaghan & Horner (2011)     | Bilingual Language Assessment: A Meta-Analysis of Diagnostic Accuracy                                                                                           | JSLHR          | Corr             | no                | no                   | no                               |
| Duchesne & Marschark (2019)   | Effects of Age at Cochlear Implantation on Vocabulary and Grammar: A Review of the Evidence                                                                     | AJSLP          | SMD              | no                | no                   | no                               |
| Ebert et al. (2011)           | Sustained Attention in Children With Primary Language Impairment: A Meta-Analysis                                                                               | JSLHR          | SMD              | no                | no                   | no                               |
| Estes et al. (2007)           | Differences in the Nonword Repetition Performance of Children With and Without Specific Language Impairment: A Meta-Analysis                                    | JSLHR          | SMD              | no                | no                   | no                               |
| Fisher (2017)                 | A Systematic Review and Meta-Analysis of Predictors of Expressive-Language Outcomes Among Late Talkers                                                          | JSLHR          | Both             | no                | no                   | no                               |
| Flippin et al. (2010)         | Effectiveness of the Picture Exchange Communication System (PECS) on Communication and Speech for Children With Autism Spectrum Disorders: A Meta-Analysis      | AJSLP          | SMD              | no                | no                   | no                               |
| Gallinat et al. (2014)        | Differences in the Performance of Children With Specific Language Impairment and Their Typically Developing Peers on Nonverbal Cognitive Tests: A Meta-Analysis | JSLHR          | SMD              | no                | no                   | no                               |
| Gatlin et al. (2015)          | Relations Among Children’s Use of Dialect and Literacy Skills: A Meta-Analysis                                                                                  | JSLHR          | Corr             | no                | no                   | no                               |
| Hearnshaw et al. (2019)       | Speech Perception Skills of Children With Speech Sound Disorders: A Systematic Review and Meta-Analysis                                                         | JSLHR          | SMD              | yes               | no                   | no                               |
| Hopkins-Rossabi et al. (2018) | Respiratory Phase and Lung Volume Patterns During Swallowing in Healthy Adults: A Systematic Review and Meta-Analysis                                           | JSLHR          | Corr             | yes               | no                   | no                               |
| Jones & Brandt (2018)         | Auditory Lexical Decisions in Developmental Language Disorder: A Meta-Analysis of Behavioral Studies                                                            | JSLHR          | SMD              | yes               | yes                  | yes                              |

| <b>Author (year)</b>     | <b>Title</b>                                                                                                                                                                               | <b>Journal</b> | <b>Meta Type</b> | <b>Registered</b> | <b>Data Provided</b> | <b>Statistical Code Provided</b> |
|--------------------------|--------------------------------------------------------------------------------------------------------------------------------------------------------------------------------------------|----------------|------------------|-------------------|----------------------|----------------------------------|
| Kan et al. (2010)        | Word Learning in Children With Primary Language Impairment: A Meta-Analysis                                                                                                                | JSLHR          | SMD              | no                | no                   | no                               |
| Kleeck et al. (2010)     | Should We Use Telegraphic or Grammatical Input in the Early Stages of Language Development With Children Who Have Language Impairments? A Meta-Analysis of the Research and Expert Opinion | AJSLP          | Corr             | no                | no                   | no                               |
| Krok et al. (2015)       | Past Tense Production in Children With and Without Specific Language Impairment Across Germanic Languages: A Meta-Analysis                                                                 | JSLHR          | SMD              | no                | no                   | no                               |
| Lammertink et al. (2017) | Statistical Learning in Specific Language Impairment: A Meta-Analysis                                                                                                                      | JSLHR          | SMD              | no                | no                   | no                               |
| Lancaster et al., (2020) | Early Speech and Language Development in Children With Nonsyndromic Cleft Lip and/or Palate: A Meta-Analysis                                                                               | JSLHR          | SMD              | no                | yes                  | yes                              |
| Latoszek et al. (2018)   | A Meta-Analysis: Acoustic Measurement of Roughness and Breathiness                                                                                                                         | JSLHR          | Corr             | no                | no                   | no                               |
| Law et al. (2004)        | The Efficacy of Treatment for Children With Developmental Speech and Language Delay/Disorder: A Meta-Analysis                                                                              | JSLHR          | SMD              | no                | no                   | no                               |
| Leung et al. (2017)      | Voice, Articulation, and Prosody Contribute to Listener Perceptions of Speaker Gender: A Systematic Review and Meta-Analysis                                                               | JSLHR          | Corr             | no                | no                   | no                               |
| Lum et al. (2015)        | A Meta-Analysis of Cross Sectional Studies Investigating Language in Maltreated Children                                                                                                   | JSLHR          | SMD              | no                | no                   | no                               |
| Ntourou et al. (2011)    | Language Abilities of Children Who Stutter: A Meta-Analytical Review                                                                                                                       | AJSLP          | SMD              | no                | no                   | no                               |
| Nye et al. (2013)        | Behavioral Stuttering Interventions for Children and Adolescents: A Systematic Review and Meta-Analysis                                                                                    | JSLHR          | SMD              | no                | no                   | no                               |
| O'Neill et al. (2018)    | Effects of Interventions That Include Aided Augmentative and Alternative Communication Input on the Communication of Individuals With Complex Communication Needs: A Meta-Analysis         | JSLHR          | SMD              | no                | no                   | no                               |
| Ofoe et al. (2018)       | Short-Term Memory, Inhibition, and Attention in Developmental Stuttering: A Meta-Analysis                                                                                                  | JSLHR          | SMD              | no                | no                   | no                               |
| Orellana et al. (2019)   | The Use of Dynamic Assessment for the Diagnosis of Language Disorders in Bilingual Children: A Meta-Analysis                                                                               | AJSLP          | Corr             | no                | no                   | no                               |
| Pauls et al. (2016)      | Executive Functions in Children With Specific Language Impairment: A Meta-Analysis                                                                                                         | JSLHR          | SMD              | no                | no                   | no                               |
| Pawlowska (2014)         | Evaluation of Three Proposed Markers for Language Impairment in English: A Meta-Analysis of Diagnostic Accuracy Studies                                                                    | JSLHR          | Corr             | no                | no                   | no                               |

| <b>Author (year)</b>    | <b>Title</b>                                                                                                                                                         | <b>Journal</b> | <b>Meta Type</b> | <b>Registered</b> | <b>Data Provided</b> | <b>Statistical Code Provided</b> |
|-------------------------|----------------------------------------------------------------------------------------------------------------------------------------------------------------------|----------------|------------------|-------------------|----------------------|----------------------------------|
| Quique et al. (2019)    | Acquisition and Generalization Responses in Aphasia Naming Treatment: A Meta-Analysis of Semantic Feature Analysis Outcomes                                          | AJSLP          | Corr             | no                | yes                  | yes                              |
| Roberts & Kaiser (2011) | The Effectiveness of Parent-Implemented Language Interventions: A Meta-Analysis                                                                                      | AJSLP          | SMD              | no                | no                   | no                               |
| Rodvick et al. (2018)   | Consonant and Vowel Identification in Cochlear Implant Users Measured by Nonsense Words: A Systematic Review and Meta-Analysis                                       | JSLHR          | SMD              | yes               | no                   | no                               |
| Rojas et al. (2020)     | How Does Our Voice Change as We Age? A Systematic Review and Meta-Analysis of Acoustic and Perceptual Voice Data From Healthy Adults Over 50 Years of Age            | JSLHR          | SMD              | no                | no                   | no                               |
| Rudolph (2017)          | Case History Risk Factors for Specific Language Impairment: A Systematic Review and Meta-Analysis                                                                    | AJSLP          | Corr             | no                | no                   | no                               |
| Sandbank & Yoder (2016) | The Association Between Parental Mean Length of Utterance and Language Outcomes in Children With Disabilities: A Correlational Meta-Analysis                         | AJSLP          | Corr             | no                | no                   | no                               |
| Sandbank et al. (2020)  | Intervention Effects on Language in Children with Autism: A Project AIM Meta-Analysis                                                                                | JSLHR          | SMD              | no                | yes                  | no                               |
| Scott et al. (2011)     | How Well Do Children Who Are Internationally Adopted Acquire Language? A Meta-Analysis                                                                               | JSLHR          | SMD              | no                | no                   | no                               |
| Singer et al. (2020)    | Clinical Characteristics Associated With Stuttering Persistence: A Meta-Analysis                                                                                     | JSLHR          | SMD?             | yes               | no                   | no                               |
| Systad et al. (2019)    | The Value of Electroencephalogram in Assessing Children With Speech and Language Impairments                                                                         | JSLHR          | Corr             | yes               | no                   | no                               |
| Weed & Fusaroli (2020)  | Acoustic Measures of Prosody in Right-Hemisphere Damage: A Systematic Review and Meta-Analysis                                                                       | JSLHR          | SMD              | no                | yes                  | yes                              |
| Whitehouse (2010)       | Is There a Sex Ratio Difference in the Familial Aggregation of Specific Language Impairment? A Meta-Analysis                                                         | JSLHR          | Corr             | no                | no                   | no                               |
| Yao et al. (2020)       | Low-Frequency Repetitive Transcranial Magnetic Stimulation in Patients With Poststroke Aphasia: Systematic Review and Meta-Analysis of Its Effect Upon Communication | JSLHR          | SMD              | no                | no                   | no                               |
| Zhao et al. (2020)      | A Meta-Analysis of the Association Between the Voice Handicap Index and Objective Voice Analysis                                                                     | JSLHR          | Corr             | no                | no                   | no                               |
| Zimmerman (2018)        | Do Infants Born Very Premature and Who Have Very Low Birth Weight Catch Up With Their Full Term Peers in Their Language Abilities by Early School Age?               | JSLHR          | SMD              | no                | no                   | no                               |

*Note.* SMD = Standardized Mean Difference; Corr = Correlational; AJSLP = *American Journal of Speech-Language Pathology*; JSLHR = *Journal of Speech, Language, and Hearing Research*.
